# Supplementary material
Source: PubMed Central journal article supplement (PMC5421506)
Supplement: GLYCO_2016_00160_Supplementarydata.pdf [file GLYCO_2016_00160_Supplementarydata.pdf]

## Supplementary data

**A pseudaminic acid or a legionaminic acid derivative transferase is strain-specifically implicated in the general protein *O*-glycosylation system of the periodontal pathogen *Tannerella forsythia***

<sup>1,§</sup>Markus B. Tomek, <sup>1,§,x</sup>Bettina Janesch, <sup>2</sup>Daniel Maresch, <sup>2,y</sup>Markus Windwarder, <sup>2</sup>Friedrich Altmann, <sup>1</sup>Paul Messner and <sup>1</sup>Christina Schäffer\*

<sup>1</sup>Department of NanoBiotechnology, *NanoGlycobiology* unit, Universität für Bodenkultur Wien, Muthgasse 11, A-1190 Vienna, Austria.

<sup>2</sup>Department of Chemistry, Universität für Bodenkultur Wien, Muthgasse 18, A-1190 Vienna, Austria.

<sup>§</sup>These authors contributed equally to this work

Key words: *Bacteroidetes* / glyco-engineering / glycosyltransferase / nonulosonic acids / periodontitis

Supplementary data: Supplementary Figures 1-3

\* To whom correspondence should be addressed: Christina Schäffer: Tel: +43-1-47654-80203; Fax: +43-1-4789112; e-mail: [christina.schaeffer@boku.ac.at](mailto:christina.schaeffer@boku.ac.at)

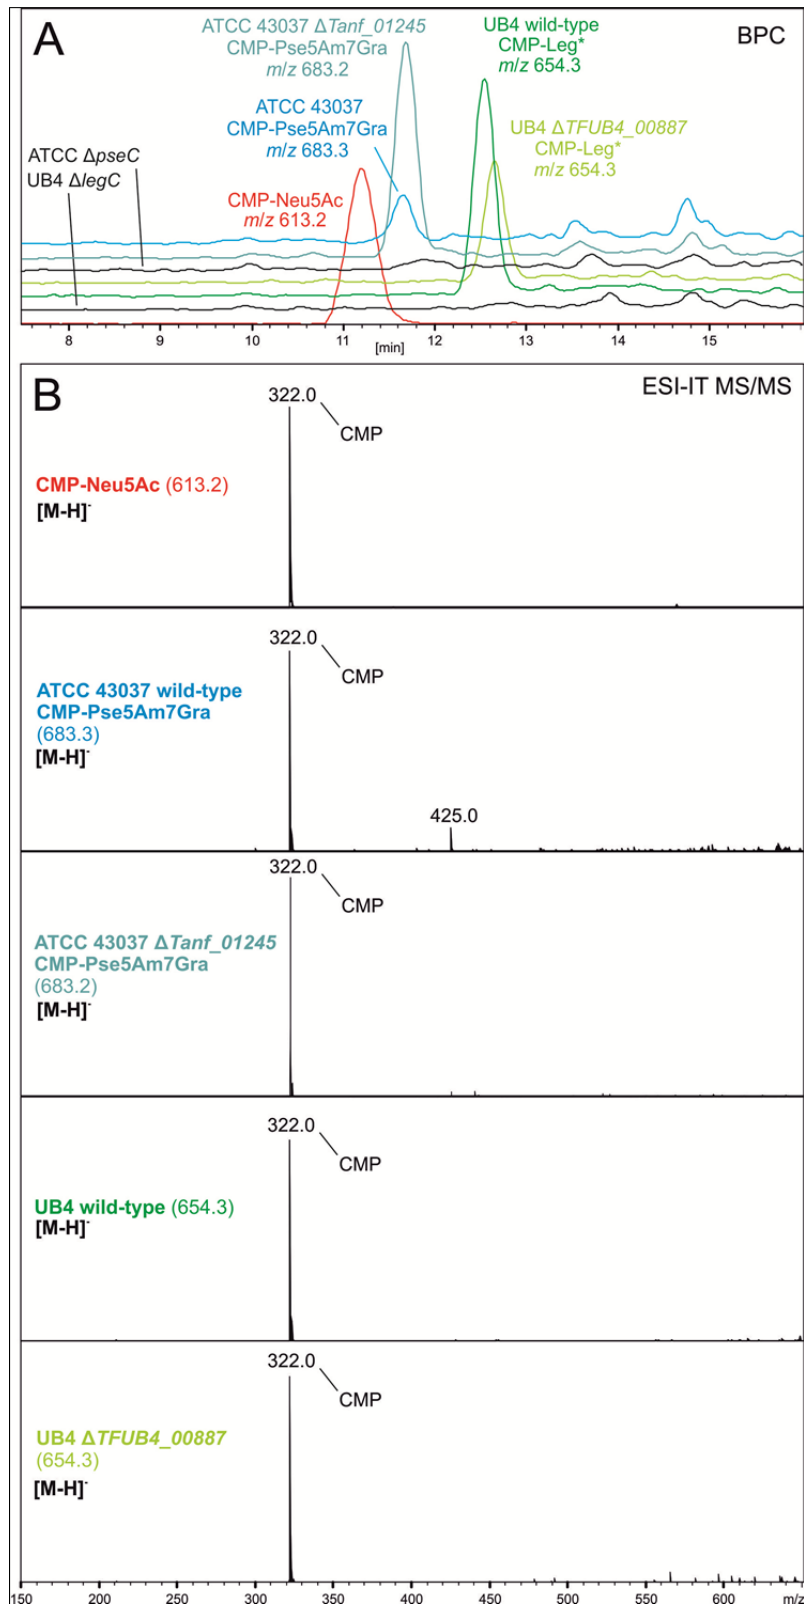

Supp. Fig. 1. ESI-MS analyses of CMP-activated sugars from *T. forsythia* ATCC 43037 and *T. forsythia* UB4. (A) Overlay of the PGC column elution profile of CMP-Neu5Ac serving

as standard ( $m/z$  613.2; red) and the known CMP-Pse5Am7Gra unit from ATCC 43037 ( $m/z$  683.3; dark blue) and the  $\Delta Tanf_{01245}$  mutant ( $m/z$  683.2; light blue) in comparison to the uniquely found UB4 mass of  $m/z=654.3$ , present in the parent strain (dark green) and the  $\Delta TFUB4_{00887}$  mutant (light green), shown in a base peak chromatogram (BPC). **(B)** Confirmation of the presence of the CMP-activator in all of the analyzed samples by CID-fragmentation, where all CMP-activated sugars show the typical  $m/z=322.0$  peak originating from CMP. The sugar part did not ionize well and, therefore, could not be detected. Relative intensities of occurring peaks are given on the y axis.

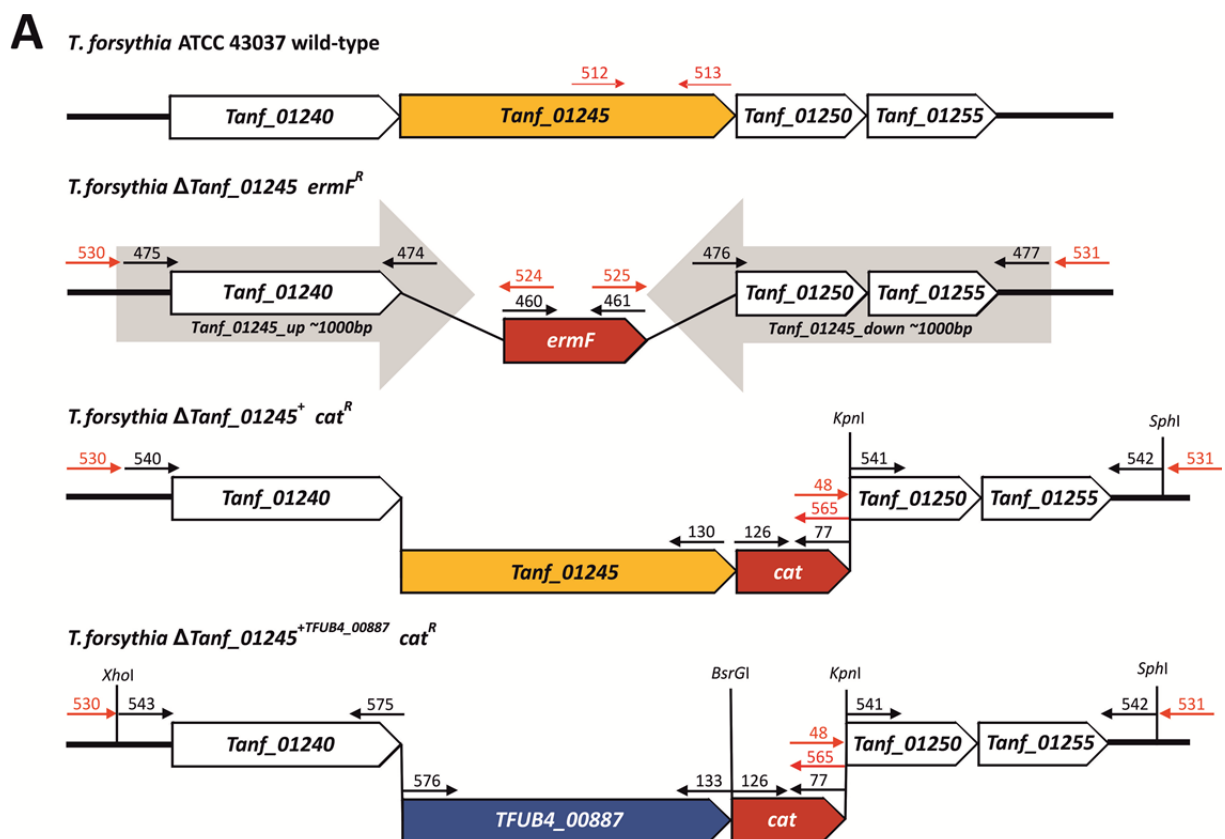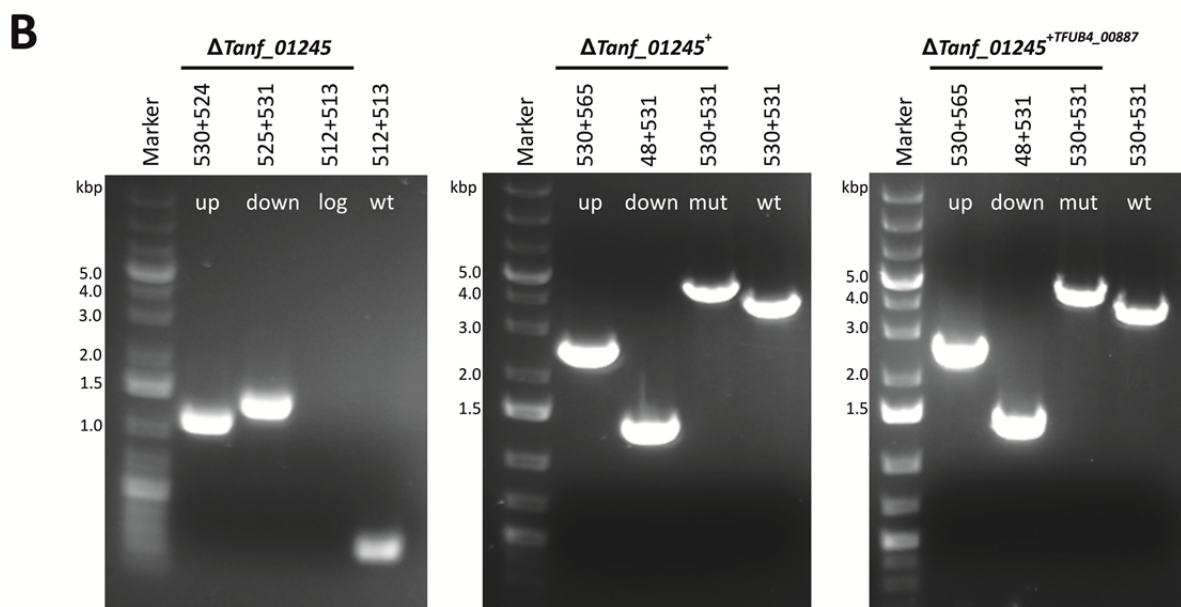

Supp. Fig. 2. Strategy for the generation of *T. forsythia* ATCC 43037 mutants at the *Tanf\_01245* locus and confirmation by PCR. (A) The genomic organization of the

*Tanf\_01245* locus is shown for the parent strain *T. forsythia* ATCC 43037, the  $\Delta$ *Tanf\_01245* mutant, the reconstituted mutant  $\Delta$ *Tanf\_01245*<sup>+</sup> and the cross-complemented mutant  $\Delta$ *Tanf\_01245*<sup>+TFUB4\_00887</sup>. Black colored arrows represent primers used for PCR amplification of genes and homologous regions, red colored primers represent those used to screen for correct integration of the knock-out, reconstitution and cross-complementation cassettes; restriction sites used for cloning are indicated (not drawn to scale). **(B)** Agarose gel electrophoresis (left) confirms the deletion of *Tanf\_01245* using the up-stream primers 530/524 (1105 bp) and down-stream primers 525/531 (1314 bp) on genomic DNA of *T. forsythia* ATCC 43037  $\Delta$ *Tanf\_01245* mutant with integrated *ermF* cassette. Primers 512/513 yield in a 239-bp PCR fragment when using *T. forsythia* wild-type genomic DNA, whereas this fragment is absent on genomic DNA of the  $\Delta$ *Tanf\_01245* mutant confirming the loss of the gene (log). The agarose gel electrophoresis (middle) confirms the reconstitution of the deleted *Tanf\_01245* gene using up-stream primers 530/565 (2442 bp) and down-stream primers 48/531 (1337 bp). Screening primers 530/531 yield in a 4374-bp PCR product on genomic DNA of the reconstituted mutant  $\Delta$ *Tanf\_01245*<sup>+</sup> with integrated *cat* resistance gene, whereas the same primer pair results in a 3700-bp product on genomic DNA of the *T. forsythia* wild-type. Agarose gel electrophoresis (right) confirms the cross-complementation with *TFUB4\_00887* using up-stream primers 530/565 (2433 bp) and down-stream primers 48/531 (1337 bp) on genomic DNA of  $\Delta$ *Tanf\_01245*<sup>+TFUB4\_00887</sup>. Screening primers 530/531 yield in a 4365-bp PCR product on genomic DNA of the cross-complemented mutant  $\Delta$ *Tanf\_01245*<sup>+TFUB4\_00887</sup>, whereas the same primer pair results in a 3700-bp product on genomic DNA of the *T. forsythia* wild-type. O'Gene Ruler 1 kb Plus DNA Ladder (Thermo Fisher Scientific) was used as a gene ladder.

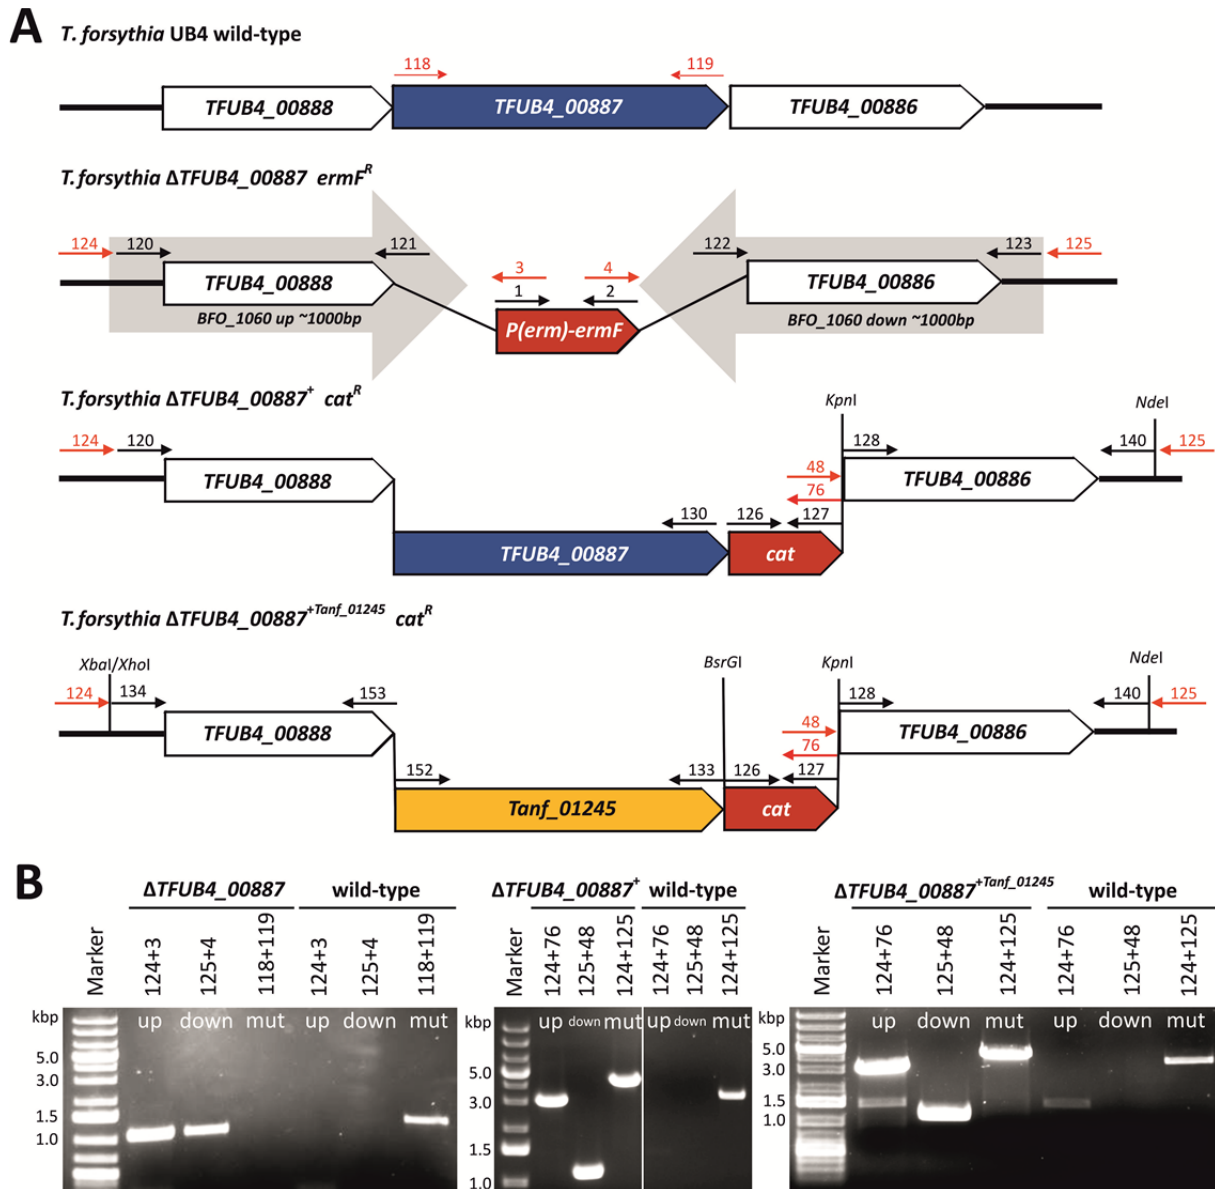

**Supp. Fig. 3. Strategy for the generation of *T. forsythia* UB4 mutants at the *TFUB4\_00887* locus and confirmation by PCR. (A) The genomic organization of the *TFUB4\_00887* locus is shown for the parent strain, the UB4  $\Delta TFUB4_00887$  mutant, the reconstituted UB4  $\Delta TFUB4_00887$ <sup>+</sup> mutant and the cross-complemented UB4  $\Delta TFUB4_00887$ <sup>+</sup>*Tanf\_01245* strain. Black colored arrows represent primers used for PCR amplification of genes and homologous regions, red colored represent those used to screen for correct integration of the knock-out, reconstitution and cross-complementation cassettes; restriction sites used for cloning are**

indicated (not drawn to scale). **(B)** Agarose gel electrophoresis (left) confirms the deletion of *TFUB4\_00887* using the up-stream primers 124/3 (1079 bp) and down-stream primers 4/125 (1090 bp) on genomic DNA of *T. forsythia* UB4  $\Delta TFUB4_00887$  mutant with integrated *ermF* cassette and on UB4 wild-type genomic DNA. Primers 118/119 yield in a 1278-bp PCR fragment when using *T. forsythia* UB4 wild-type genomic DNA, whereas this fragment is absent on genomic DNA of the  $\Delta TFUB4_00887$  mutant (mut), confirming the loss of the gene. The agarose gel electrophoresis (middle) confirms the reconstitution of the deleted *TFUB4\_00887* gene using up-stream primers 124/76 (2987 bp) and down-stream primers 48/125 (1102 bp). Screening primers 124/125 yield in a 4048-bp PCR product on genomic DNA of the reconstituted mutant  $\Delta TFUB4_00887^+$  with integrated *cat* resistance gene, whereas the same primer pair results in a 3395-bp product on genomic DNA of the *T. forsythia* UB4 wild-type. Agarose gel electrophoresis (right) confirms the cross-complementation with *Tanf\_01245* using up-stream primers 124/76 (3047 bp) and down-stream primers 48/125 (1102 bp) on genomic DNA of  $\Delta TFUB4_00887^{+Tanf_01245}$ . Screening primers 124/125 yield in a 4118-bp PCR product on genomic DNA of the cross-complemented mutant  $\Delta TFUB4_00887^{+Tanf_01245}$ , whereas the same primer pair results in a 3395-bp product on genomic DNA of the *T. forsythia* UB4 wild-type. O'Gene Ruler 1 kb Plus DNA Ladder (Thermo Fisher Scientific) was used as a gene ladder.
